# Supplementary material for: An energy-harvesting scheme employing CuGaSe2 quantum dot-modified ZnO buffer layers for drastic conversion efficiency enhancement in inorganic–organic hybrid solar cells
Source: Royal Society of Chemistry journal article supplement (doi:10.1039/c3nr34155k), 2013-01-01
Supplement: c3nr34155k.pdf [file c3nr34155k.pdf]

## Supplementary Information

### **An Energy-Harvesting Scheme Employing CuGaSe<sub>2</sub> Quantum Dot-Modified ZnO Buffer Layers for Drastic Conversion Efficiency Enhancement in Inorganic-Organic Hybrid Solar Cells**

Cherng-Rong Ho,<sup>1</sup> Meng-Lin Tsai,<sup>1</sup> Hung-Jun Jhuo,<sup>2</sup> Der-Hsien Lien,<sup>1</sup> Chin-An Lin,<sup>1</sup>

Shin-Hung Tsai,<sup>1</sup> Tzu-Chiao Wei,<sup>1</sup> Kun-Ping Huang,<sup>3</sup> Show-An Chen,<sup>2</sup> Jr-Hau He<sup>1,a)</sup>

<sup>1</sup>Institute of Photonics and Optoelectronics and Department of Electrical Engineering,  
National Taiwan University, Taipei, 10617, Taiwan.

<sup>2</sup>Department of Chemical Engineering, National Tsing Hua University, Hsinchu,  
30013, Taiwan.

<sup>3</sup>Mechanical and Systems Research Laboratories, Industrial Technology Research  
Institute, Hsinchu, 31040, Taiwan.

---

<sup>a)</sup> Author to whom correspondence should be addressed. Electronic mail: [jhhe@ntu.edu.tw](mailto:jhhe@ntu.edu.tw). Tel.: +886-2-33669646. Fax: +886-2-23677467

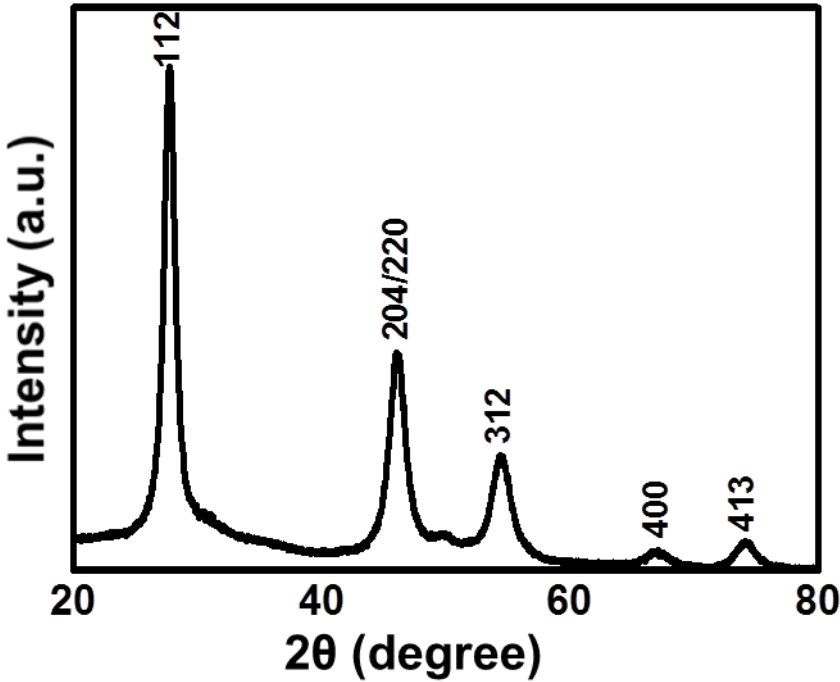

FIG. S1. The X-ray diffraction spectrum of CGS QDs.

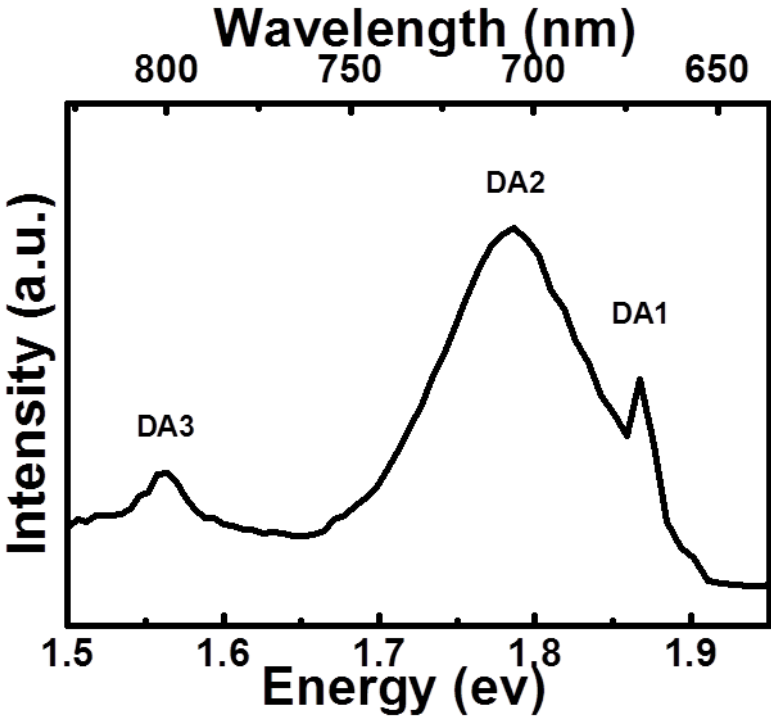

FIG. S2. The PL spectrum of CGS QDs.

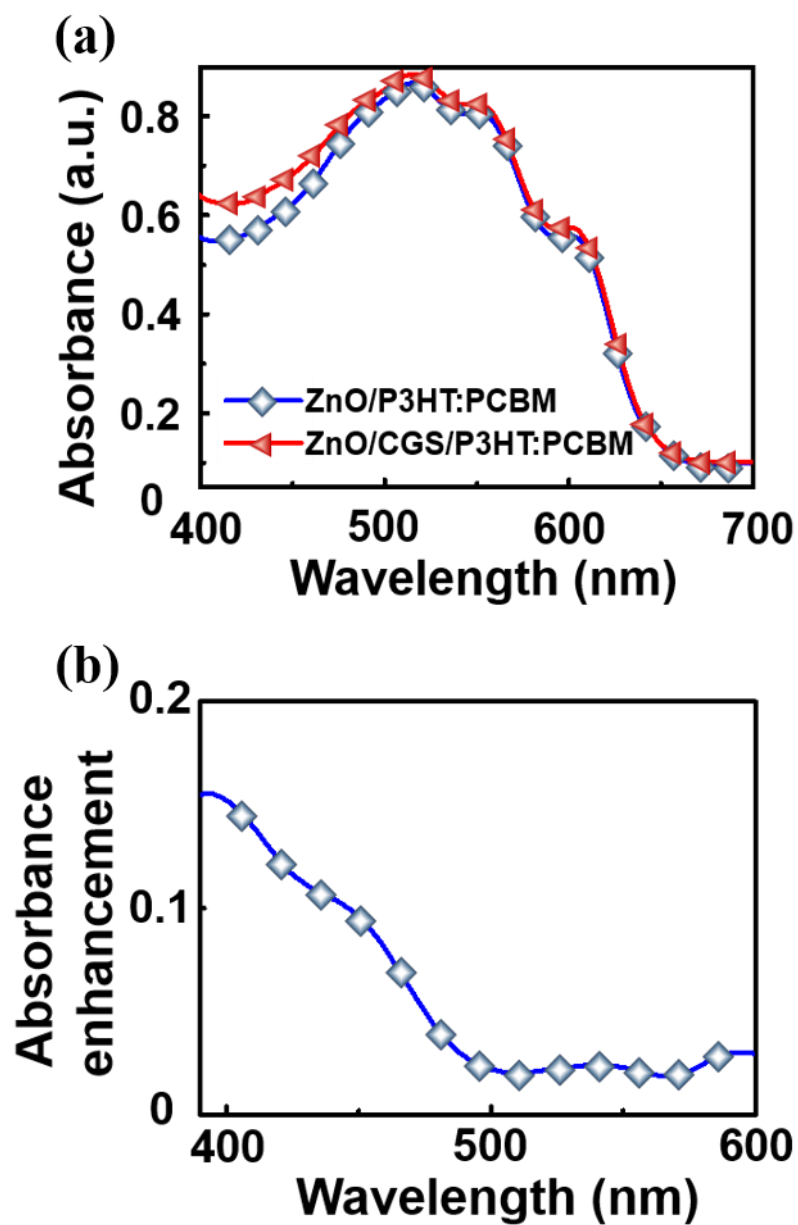

FIG. S3. (a) Absorbance spectra of OPVs with and without CGS QD modification. (b) Absorbance enhancement of OPVs with CGS QD modification.
